# Supplementary material for: Synthesis, crystal structure, self-assembly of C60 derivatives bearing rigid pyridine substituents
Source: Royal Society of Chemistry journal article supplement (doi:10.1039/c8ra09893j), 2019-01-01
Supplement: c8ra09893j1.pdf [file c8ra09893j1.pdf]

## Supporting Information

### Synthesis, Crystal structure, Self-assembly of C<sub>60</sub> Derivative Bearing Rigid Pyridine Substituent

Min Ai,<sup>a</sup> Jie Li,<sup>a</sup> Zijuan Ji,<sup>a</sup> Chuanhui Wang,<sup>a</sup> Rui Li,<sup>a</sup> Wei Dai<sup>\*a</sup> and Muqing Chen<sup>\*a,b</sup>

<sup>a</sup> School of Physics and Mechanical & Electrical Engineering, Hubei University of Education

129 Gaoxin Second Road, Wuhan Hi-Tech Zone, Wuhan 430205, P.R. China, E-mail:

[mqchen@ustc.edu.cn](mailto:mqchen@ustc.edu.cn), [daiwei@hue.edu.cn](mailto:daiwei@hue.edu.cn)

<sup>b</sup> Department of Materials Science and Engineering, University of Science and Technology of

China (USTC), Hefei 230026, China, E-mail: [mqchen@ustc.edu.cn](mailto:mqchen@ustc.edu.cn)

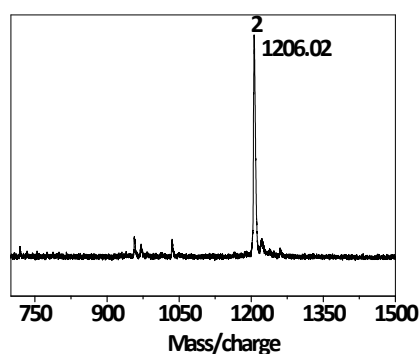

**Figure S1.** The MALDI-TOF spectra of **2**

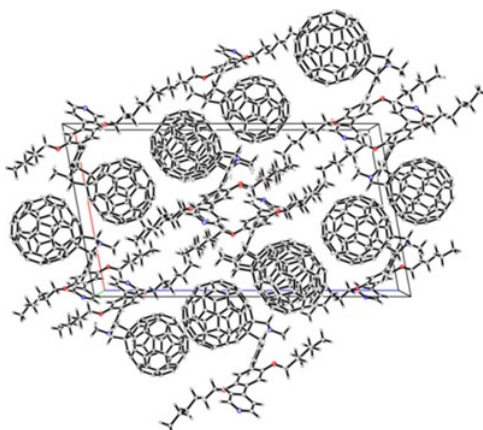

**Figure S2.** The crystal packing of **2**

Table S1 Redox potentials of compound **2** in comparison with C<sub>60</sub>

| Compound | E <sup>0/-1</sup> | E <sup>-1/-2</sup> | E <sup>-2/-3</sup> | E <sup>-3/-4</sup> |
|----------|-------------------|--------------------|--------------------|--------------------|
|----------|-------------------|--------------------|--------------------|--------------------|

|                 |       |       |       |       |
|-----------------|-------|-------|-------|-------|
| C <sub>60</sub> | -1.07 | -1.46 | -1.91 | -2.37 |
| <b>2</b>        | -1.20 | -1.59 | -2.11 | -     |

Table S2. Cartesian coordinates of **2**.

**2** xyz file

|   |          |          |          |
|---|----------|----------|----------|
| C | 5.95273  | 1.71842  | 0.07351  |
| C | 5.53246  | 1.89094  | 1.45727  |
| C | 5.45608  | 0.78951  | 2.30394  |
| C | 6.1974   | -0.70177 | 0.4802   |
| C | 6.28067  | 0.45324  | -0.40323 |
| C | 4.48499  | 2.90886  | 1.48965  |
| C | 4.32977  | 0.65497  | 3.22605  |
| C | 5.70541  | -1.83253 | -0.29553 |
| C | 5.84046  | 0.03925  | -1.73457 |
| C | 5.16814  | 2.62884  | -0.75629 |
| C | 4.83493  | -2.74924 | 0.28484  |
| C | 4.4122   | -2.57667 | 1.67286  |
| C | 3.41702  | 2.78208  | 2.36934  |
| C | 3.96989  | -0.75892 | 3.28597  |
| C | 3.33699  | 1.6253   | 3.25963  |
| C | 5.47766  | -1.37336 | -1.66397 |
| C | 5.09822  | 0.90761  | -2.52441 |
| C | 4.75446  | 2.23658  | -2.02323 |
| C | 4.2582   | 3.36169  | 0.11991  |
| C | 3.95828  | 0.41047  | -3.29151 |
| C | 3.40374  | 2.55061  | -2.47928 |
| C | 2.96978  | 3.65637  | -0.30867 |
| C | 4.38575  | -1.84426 | -2.38318 |
| C | 1.93228  | 1.2366   | 3.36324  |
| C | 2.91648  | 1.42687  | -3.26423 |
| C | 2.53014  | 3.23773  | -1.63715 |
| C | 1.8456   | 3.51687  | 0.61256  |
| C | 0.71515  | 2.99337  | -0.13496 |
| C | 0.44397  | -0.6088  | 2.65899  |
| C | 1.1426   | 2.81855  | -1.5396  |
| C | 0.67948  | 1.75324  | -2.28387 |
| C | -0.23758 | 0.74986  | -1.68537 |
| C | 1.57888  | 1.04362  | -3.17137 |
| C | 3.4634   | -2.79188 | -1.76524 |
| C | -0.30016 | 0.25124  | 1.87819  |
| C | 3.60749  | -0.93613 | -3.21786 |
| C | 2.20706  | -1.32658 | -3.12897 |
| C | 0.06098  | 1.66138  | 1.81638  |

|   |          |          |          |
|---|----------|----------|----------|
| C | 0.79425  | -1.94814 | 2.13067  |
| C | 0.37365  | -2.33475 | 0.87682  |
| C | -0.14862 | 2.08971  | 0.44753  |
| C | -0.64986 | 0.91838  | -0.31168 |
| C | 1.21678  | -0.36574 | -3.1041  |
| C | 0.06703  | -0.50104 | -2.19365 |
| C | -0.76511 | -0.16315 | 0.54273  |
| C | 2.11809  | -2.48818 | -2.21223 |
| C | 1.27267  | -3.03699 | 0.00539  |
| C | 1.05386  | -2.61255 | -1.34732 |
| C | 1.58883  | -0.11306 | 3.41124  |
| C | 2.63316  | -1.12941 | 3.36901  |
| C | 2.13979  | -2.25189 | 2.57723  |
| C | 2.06303  | 3.09767  | 1.92453  |
| C | 1.14874  | 2.14746  | 2.54066  |
| C | 5.79348  | -0.53691 | 1.80574  |
| C | 4.88031  | -1.4961  | 2.41292  |
| C | 3.01122  | -2.97053 | 1.76217  |
| C | 3.69078  | -3.24765 | -0.46896 |
| C | 2.56961  | -3.36796 | 0.441    |
| C | -0.23698 | -1.78976 | -1.47582 |
| C | -0.72128 | -1.59681 | 0.08414  |
| C | -3.36602 | -1.5967  | 0.13545  |
| C | -4.3759  | -1.91803 | 1.05556  |
| C | -3.64794 | -0.59501 | -0.80927 |
| C | -5.60862 | -1.27367 | 1.0485   |
| H | -4.18572 | -2.67991 | 1.80513  |
| C | -4.88341 | 0.04509  | -0.83571 |
| H | -2.90142 | -0.29316 | -1.53098 |
| H | -6.4688  | -1.7434  | 1.56263  |
| H | -4.97299 | 1.02065  | -1.35597 |
| C | -2.07566 | -2.40867 | 0.17364  |
| C | -1.37512 | -2.648   | -2.10225 |
| H | -0.97261 | -3.34643 | -2.84184 |
| H | -2.06959 | -2.96978 | 1.11454  |
| C | -3.04038 | -4.27421 | -1.21356 |
| H | -2.73471 | -5.00855 | -1.96587 |
| H | -3.93528 | -3.74299 | -1.57393 |
| H | -3.30102 | -4.81086 | -0.29581 |
| N | -1.89965 | -3.38276 | -0.93973 |
| H | -2.11723 | -1.9993  | -2.59423 |
| C | -6.86042 | 0.22728  | 0.07547  |
| C | -7.05166 | 1.39685  | 0.81082  |
| C | -7.90662 | -0.29828 | -0.68379 |

|   |           |          |          |
|---|-----------|----------|----------|
| C | -8.28844  | 2.04204  | 0.78644  |
| H | -6.22729  | 1.81145  | 1.40896  |
| C | -9.14321  | 0.34654  | -0.70775 |
| H | -9.86353  | 0.12358  | -1.54372 |
| C | -10.30875 | 2.02581  | 0.0078   |
| C | -11.28773 | 1.69369  | 0.94402  |
| C | -10.56627 | 3.00365  | -0.95383 |
| C | -12.52402 | 2.33983  | 0.91995  |
| H | -11.08495 | 0.92342  | 1.70217  |
| C | -11.80246 | 3.64925  | -0.97813 |
| H | -9.79425  | 3.2653   | -1.69194 |
| H | -13.29557 | 2.07815  | 1.65845  |
| H | -12.00573 | 4.41994  | -1.73589 |
| C | -5.88542  | -0.28098 | 0.09415  |
| C | -9.33405  | 1.51701  | 0.0271   |
| O | -8.61218  | 2.97096  | 1.82432  |
| O | -7.71026  | -1.49751 | -1.43759 |
| C | -8.69852  | 4.2887   | 1.27568  |
| H | -9.68809  | 4.67008  | 1.41779  |
| H | -7.9959   | 4.92723  | 1.76913  |
| H | -8.47618  | 4.25477  | 0.22958  |
| C | -8.97326  | -1.98217 | -1.90108 |
| H | -9.64621  | -2.07177 | -1.07403 |
| H | -9.3772   | -1.29721 | -2.61701 |
| H | -8.8414   | -2.9402  | -2.35901 |
| N | -12.78128 | 3.31761  | -0.04094 |
